1

2

3 **From Traits to Puffs: The Interplay of Personality, Pandemic Stress, and Smoking Behaviors**

4

5 Ying Tian <sup>1¶</sup>, Weiyi Xiang<sup>1¶</sup>, Silvia Dzhugaryan,<sup>1&</sup> Dayoung Bae,<sup>13</sup> Jessica Barrington-Trimis,<sup>13</sup> Terry  
6 Church <sup>2\*</sup>

7

8

9 <sup>1</sup>University of Southern California Keck School of Medicine, Institution of Addiction Science, Los  
10 Angeles, CA, USA

11 <sup>2</sup>University of Southern California, Alfred E. Mann, School of Pharmacy and Pharmaceutical Sciences,  
12 Los Angeles, CA, USA

13 <sup>3</sup>University of Southern California, Keck School of Medicine, Department of Population and Public  
14 Health Sciences, Los Angeles, CA, USA

15

16 \*Corresponding author  
17 Email: [tdchurch@usc.edu](mailto:tdchurch@usc.edu)

18 ¶ These authors contributed equally to this work.

19 & These authors also contributed equally to this work.

20

## 21 **Abstract**

22 Smoking, a leading cause of chronic diseases, is often used to cope with stress, which has been  
23 heightened by the pandemic due to health and economic concerns. Studies have shown that the Big Five  
24 personality traits are linked to smoking behavior, suggesting that different personality traits influence  
25 nicotine use in varying ways. However, there remains a significant gap in understanding how individuals  
26 with different personalities respond to nicotine use under stress. This study aims to investigate how  
27 nicotine dependence changes for different Big Five personalities under the pandemic stress and whether  
28 other stress-related factors influence nicotine dependence during COVID-19. This cross-sectional study  
29 collect data from randomly selected adults aged 18-30 in the US. The Big Five Personality Model  
30 assessed personality traits, and nicotine dependence was measured with the Hooked-on Nicotine  
31 Checklist. Stress was evaluated using the Perceived Stress Scale, while demographics and other  
32 pandemic-related stressors were gathered through structured questions. Correlation and multiple logistic  
33 regression models were used for data analysis. The main findings showed that both before ( $r = -.25$ ,  $p$   
34  $< .001$ ) and during ( $r = -.19$ ,  $p < .001$ ) the pandemic, agreeableness was significantly negatively  
35 associated with nicotine dependence, indicating that higher agreeableness was linked to lower nicotine  
36 dependence. Similarly, conscientiousness was negatively correlated with nicotine dependence both before  
37 ( $r = -.123$ ,  $p < .001$ ) and during COVID-19 ( $r = -.19$ ,  $p < .001$ ). Although no direct association was found  
38 between perceived stress, personality traits, and smoking behavior, the analysis identified that external  
39 stressors played a moderating role. These findings emphasize the importance of understanding how  
40 different personality traits influence young people's dependence on nicotine under stress. The outcome  
41 can guide the design of targeted nicotine withdrawal interventions and inform effective public health  
42 strategies.

43

44

## 45 **Introduction**

46 Tobacco use has been one of the most serious public health problems. Studies have shown that  
47 tobacco use can cause cardiovascular damage, respiratory conditions like emphysema and chronic  
48 obstructive pulmonary disease (COPD), and mouth cancer (1). By 2020, 22.3% of the global population  
49 uses tobacco, and nearly 8 million people die from tobacco use each year (2). However, among the fatal  
50 diseases, tobacco-related diseases can be effectively reduced or even artificially avoided, and reducing  
51 tobacco use can effectively reduce the global burden of disease (3). Therefore, it is important to  
52 understand the motivations and mechanisms underlying smoking behavior and nicotine dependence.

53 Personality traits have been shown to play an important role in smoking behavior, and there are  
54 significant differences in smoking behavior among people with different personalities. Studies have found

55 that people with high levels of extraversion and neuroticism are more likely to start smoking. This may be  
56 due to their impulsivity, social tendencies, or emotional instability (4, 5). On the other hand, individuals  
57 who score high in conscientiousness and agreeableness tend to smoke less. These traits are often linked to  
58 better self-control and respect for social norms(4). Openness, however, is associated with higher nicotine  
59 dependence. This suggests that people who are more open to experiences may be more willing to  
60 experiment with substances like tobacco(5). Different personality traits not only influence the individual's  
61 propensity to smoke but may also determine their level of nicotine dependence and ease of quitting. For  
62 men, those with lower neuroticism and extraversion and higher openness were more likely to be  
63 successful in quitting, while women with lower conscientiousness were more likely to quit (6). These  
64 findings suggest that individual personality traits may play a key role in the development and  
65 maintenance of smoking behavior.

66 Moreover, stress is also an important factor that influences smoking behavior. People often  
67 smoke as a means of coping with negative emotions and to relieve major stressful events in their lives(7).  
68 Studies have shown that when smokers' stress levels or negative emotions increase, their daily tobacco  
69 consumption, time spent smoking, and frequency of smoking also increase significantly(8-10). This  
70 phenomenon may be due to the transient relaxing effect of the nicotine component of cigarettes. By  
71 influencing the central nervous system, nicotine controls the production of dopamine, resulting in a  
72 transient pleasure experience and a calming effect (11). High levels of stress are also one of the main  
73 reasons why smokers relapse. Studies have shown that stress significantly increases the likelihood of  
74 relapse by making smokers more inclined to remember the environment associated with smoking and  
75 enhancing their memory bias for smoking-related items(12).

76 In the specific context of the COVID-19 pandemic, the complexity of smoking behavior has been  
77 further exacerbated by the unprecedented amplification of psychological stress. Surveys have shown that  
78 the COVID-19 epidemic has disrupted people's daily, increased anxiety of isolation, unemployment, and  
79 health anxiety(13, 14). One study noted that during the COVID-19 pandemic, 28% of participants  
80 (n=3396) reported an increase in their smoking, with increased stress, prolonged time spent at home, and

81 boredom cited as the main reasons(15). In addition, 16.8% of young nicotine e-cigarette users in 2020  
82 reported that they had increased their smoking frequency due to epidemic-related stressors(16).

83 Although a large number of studies have validated personality traits and stress as a cause of  
84 smoking, their interaction has rarely been noted. Thus, the objective of this study is to investigate how  
85 stress from the COVID-19 pandemic influenced nicotine dependence based on the Big Five personality  
86 traits (e.g., neuroticism, extraversion, openness, agreeableness, and conscientiousness) within nicotine  
87 users vs non-nicotine users in young adults. We have three hypotheses: (1) Personality is related to  
88 nicotine. (2) people with neuroticism and extraversion personalities show an increase in nicotine  
89 dependence, whereas people with conscientious personalities do not show significant changes or  
90 decreases in nicotine dependence. (3) Other stress-related factors influence nicotine dependence during  
91 COVID-19, such as health concerns, access to nicotine, economic factors, mental health, routine  
92 disruption, social networking, and traumatic events.

### 93 **Methods**

94 This study has been approved and exempted by the University of Southern California Institutional  
95 Review Board and participant authorization was obtained in the form of posters and questionnaires (IRB  
96 Study ID: UP-23-01234). Our observational cross-sectional survey was conducted from February 2024 to  
97 May 13, 2024. Participants aged 18–30, able to provide informed consent, were recruited through flyers at  
98 the University of Southern California, social media platforms (Instagram and Snapchat), and Amazon  
99 Mechanical Turk (MTurk). Incentives included an Apple AirPods, eight Apple AirTags, and a >5% chance  
100 to win a \$10 Amazon gift card. Of the 433 respondents, <30% of data were excluded due to ineligibility  
101 or incomplete responses, yielding a final sample of 323 participants. Inclusion criteria required  
102 participants to be aged 18–30 and able to complete the survey. Participants who have used any nicotine  
103 product in their lifetime answered the following questions measuring sociodemographics, personality  
104 (Big Five) if they used any nicotine products, what type of nicotine product, nicotine consumption hooked  
105 on nicotine checklist (HONC), other influences of nicotine behavior, and retrospectively reported  
106 perceived stress (PSS) levels both before COVID-19 (2018-2019) and during COVID-19 (2020-2021).

107 Non-nicotine users only answered the following questions: measuring, sociodemographics, personality  
108 (Big Five), and whether they have ever used any nicotine products. All measurements had the same  
109 variables and scoring in conjunction with the following timeline.

## 110 **Measures**

111 Personality traits were measured using the 44-item Big Five Personality Inventory (Goldberg,  
112 1993), which assesses five dimensions: Extraversion, Neuroticism, Agreeableness, Conscientiousness,  
113 and Openness. Items were rated on a 5-point Likert scale ranging from 1 = “Strongly Disagree” to 5 =  
114 “Strongly Agree.” Some items required reverse coding, and final scores were calculated by summing all  
115 items within each dimension, with higher scores indicating stronger traits. This scale has demonstrated  
116 high reliability (Cronbach’s  $\alpha = 0.70\text{--}0.90$ ).

117 Nicotine dependence was assessed using the Hooked on Nicotine Checklist (HONC), a 10-item  
118 tool designed to evaluate the loss of autonomy over nicotine use. Responses were scored as 1 = “Yes” and  
119 0 = “No,” with total scores ranging from 0 to 10. Dependence levels were categorized as follows: 0 = No  
120 dependence, 1–2 = Low dependence, 3–5 = Moderate dependence, 6–8 = High dependence, and 9–10 =  
121 Severe dependence. Participants who reported lifetime nicotine use (yes/no) were further queried about  
122 specific products used, including e-cigarettes, cigars, hookah, smokeless tobacco, non-combustibles, and  
123 dissolvables. Only nicotine users completed the HONC and related measures of nicotine behaviors.

124 Stress levels were measured using the Perceived Stress Scale (PSS), a 10-item questionnaire  
125 assessing perceived stress in the past month. Items were rated on a 5-point Likert scale from 0 = “Never”  
126 to 4 = “Very Often.” Scores were calculated by summing all item responses, with higher scores indicating  
127 greater stress. Several items required reverse coding before summing. The PSS has demonstrated high  
128 reliability (Cronbach’s  $\alpha = 0.70\text{--}0.90$ ).

129 To further explore the relationship between stress regulation, personality, and nicotine use  
130 behavior, an additional stress-related factors questionnaire was administered. This measure assessed the

131 influence of factors such as stress relief, relaxation, boredom, social situations, and academic pressure on  
132 nicotine use. Participants rated these factors on a 5-point Likert scale ranging from 1 = “Not at all” to 5 =  
133 “Extremely,” with higher scores indicating a stronger influence. This questionnaire, completed only by  
134 nicotine users, aimed to identify specific stressors contributing to nicotine consumption and demonstrated  
135 high internal consistency (Cronbach’s  $\alpha = 0.92$ ). Non-nicotine users were excluded from this assessment.

136 Demographic information, including age, gender, race/ethnicity, financial status, and health  
137 conditions, was collected to contextualize findings and assess sociodemographic influences on nicotine  
138 use. Participants provided responses regarding their age, assigned sex at birth, gender identity,  
139 race/ethnicity, and personal financial situation, alongside self-reported health conditions diagnosed by a  
140 healthcare provider. Together, these measures provided a detailed understanding of how stress influences  
141 the relationship between personality and nicotine use.

## 142 **Data Analyze**

143 This study used SPSS for descriptive statistics, correlations, and multiple regression models to  
144 ensure the accuracy of experimental data analysis and examine relationships between key variables.

145 First, descriptive statistics were used to summarize and describe participants' demographic  
146 characteristics, health status, and economic status to provide a clear base profile for subsequent analyses.

147 The 'Crosstabs' function was used in SPSS to compare nicotine users and non-users, generating  
148 contingency tables that provide an overview of participant diversity.

149 Subsequently, correlations were conducted to test the hypothesis of the moderate effect of  
150 pandemic stress on the relationship between personality traits and nicotine dependence. In SPSS, the  
151 ‘Pearson correlation’ function assessed the strength and direction of associations between variables,  
152 providing a reliable measure of their linear relationships.

153 Moreover, multiple logistic regression analyses were performed using the built-in "Logistic  
154 Regression" tool in SPSS to effectively assess the pathways of nicotine dependence across personality  
155 traits and pandemic-related stress. This approach explores the moderate effects of COVID-related  
156 concerns between personality traits and nicotine dependences.

## 157 **Results**

### 158 **Descriptive results, by Nicotine Use Status**

159  
160 Demographic data were collected on age, sex at birth, race/ethnicity, sexual orientation, gender  
161 identity, diagnosed health diseases, and financial income as "Table 1". The study includes 324  
162 participants, with 269 nicotine users and 54 non-nicotine users. The average age of all participants is  
163 26.10 years; nicotine users averaged 26.78 years, while non-nicotine users averaged 22.69 years. There  
164 are more males and fewer females among the nicotine users (57.4% male and 33.1% female) than the  
165 non-nicotine users (33.3% male and 66.9% female). Nicotine users have a lower percentage of  
166 Heterosexual/Straight individuals (63.6%), and a higher percentage of Bisexual individuals (30.5%)  
167 compared to non-nicotine users (81.5% and 11.1%, respectively). In terms of health diagnoses, there are,  
168 more nicotine users were diagnosed with a disease (66.5%) compared to non-nicotine users (16.7%),  
169 including 28.6% of nicotine users with a physical disability. Financially, more nicotine users lived  
170 comfortably (54.6%) compared to non-nicotine users (42.6%). A higher percentage of non-nicotine users  
171 met their needs with little left over (33.3% vs. 26.0%) or just met basic expenses (20.4% vs. 19.0%).

172 As shown in "Table 2", nicotine users had higher extraversion scores (25.73 vs. 23.96,  $p < .05$ )  
173 and lower agreeableness (29.23 vs. 32.85,  $p < .001$ ) and conscientiousness scores (29.03 vs. 31.25,  $p$   
174  $< .001$ ) compared to non-nicotine users. For nicotine users, we also assessed HONC and PSS scores  
175 before and during COVID-19. The average HONC score slightly decreased during COVID-19 (4.71, SD  
176 = 4.00) compared to before (4.85, SD = 3.96). PSS scores were stable, with an average of 26.77 (SD =  
177 3.50) during COVID-19 and 26.62 (SD = 3.63) before COVID-19.

## 178 **Association of Personality with Nicotine Dependence in Nicotine product users**

179 As “Table 3” indicates, for all nicotine users, agreeableness was negatively associated with  
180 nicotine dependence both before ( $r = -.25, p < 0.001$ ) and during COVID-19 ( $r = -.19, p < 0.001$ ).  
181 Conscientiousness was also negatively associated before COVID-19 ( $r = -.123, p < 0.001$ ). To examine  
182 the relationship between personality traits and nicotine dependence under COVID-19 stress, participants  
183 were categorized into low and high-stress groups based on their PSS scores relative to the mean. Those  
184 scoring above the mean were placed in the high-stress group, while those below were in the low-stress  
185 group. Before COVID-19, agreeableness was negatively associated with nicotine dependence in the low-  
186 stress group ( $r = -.19, p < 0.05$ ). In the high-stress group, extraversion showed a positive association with  
187 nicotine dependence ( $r = .23, p < 0.05$ ), and agreeableness a negative one ( $r = -.25, p < 0.05$ ). During  
188 COVID-19, no significant correlations between personality traits and nicotine dependence were observed.

189 “Table 4” used three regression models to examine the relationships between personality traits  
190 and nicotine dependence, personality traits and COVID-19 concerns, and COVID-19 concerns and  
191 nicotine dependence. Model one is to test the regression between personalities and nicotine dependence.  
192 Among the five personality traits, agreeableness was significantly negatively associated with nicotine  
193 dependence ( $B = -.170, p < .05$ ), indicating that higher agreeableness is linked to lower nicotine  
194 dependence.

195 In model two, which tests the regression between personalities and COVID-19 concerns,  
196 agreeableness was consistently negatively associated with various COVID-19-related concerns, including  
197 health ( $B = -.020, p < .001$ ), economic ( $B = -.034, p < .001$ ), mental health stress ( $B = -.018, p < .05$ ),  
198 routine disruption ( $B = -.023, p < .001$ ), social network ( $B = -.017, p < .05$ ), and traumatic events ( $B =$   
199  $-.021, p < .05$ ). Extraversion was positively linked to concerns about access to nicotine ( $B = .019, p$   
200  $< .05$ ), while neuroticism was negatively associated with health ( $B = -.019, p < .001$ ) and economic



201 concerns ( $B = -.016, p < .05$ ). These findings underscore the significant roles of agreeableness,  
202 extraversion, and neuroticism in shaping responses to COVID-19-related concerns.

203           The regression between COVID-19 concerns and nicotine dependence was tested in model three.  
204 The regression analysis identified significant predictors of nicotine dependence during COVID-19.  
205 Access to nicotine was positively associated with increased dependence ( $B = 2.666, p < .05$ ), as were  
206 routine disruption ( $B = 2.571, p < .05$ ) and traumatic events ( $B = 2.139, p < .05$ ). These findings suggest  
207 that these stress factors contributed to higher nicotine dependence during the pandemic. Other factors,  
208 such as health concerns ( $B = -.469, p = .557$ ), economic factors ( $B = -1.663, p = .076$ ), mental health  
209 stress ( $B = 1.204, p = .148$ ), and social network concerns ( $B = -.771, p = .414$ ), were not significant  
210 predictors of nicotine dependence.

## 211 **Discussion**

212           This study revealed significant correlations between personality traits, stress, and nicotine  
213 dependence levels among young adults. Notably, extraversion, conscientiousness, and agreeableness  
214 showed significant differences between nicotine users and non-users. Moreover, specific stress factors  
215 related to the COVID-19 pandemic, such as access to nicotine, routine disruption, and traumatic events,  
216 were potential predictors of increased nicotine dependence. The demographic characteristics of our  
217 sample provide us with critical insights into the relationship between personal traits and smoking  
218 behavior. The first significance we observed is gender difference, with a higher percentage of males  
219 among the nicotine users, suggesting that males may have different stress-coping strategies compared to  
220 females, possibly leading to higher smoking prevalence. Another notable finding related to the health of  
221 the participants was that most nicotine users were diagnosed with a medical condition, with 69.5%  
222 diagnosed with a disease, compared to 16.7 % of non-nicotine users; suggesting that individuals with  
223 physical health risks are more likely to be associated with smoking behavior. Additionally, the younger  
224 average age of non-nicotine users might reflect a generational shift in smoking behaviors due to targeted

225 public health campaigns. Our findings are consistent with previous studies that have reported higher rates  
226 of smoking among men and older age groups “Table 1-2”. Also, we found that a higher percentage of  
227 nicotine users were bisexual compared to non-nicotine users, a novel finding that warrants further study.  
228 An explanation for this is that this population may face unique stressors or social stigma that led to higher  
229 dependence on nicotine, which is consistent with the findings on the effects of minority stress on  
230 substance use “Table 3”.

231 Compared to non-nicotine users, active users showed higher extraversion scores and lower  
232 agreeableness and conscientiousness scores. The positive correlation between extraversion and smoking  
233 behavior is consistent with previous research suggesting that extroverts are more likely to engage in social  
234 smoking behaviors. At the same time, lower levels of agreeableness and conscientiousness among  
235 nicotine users suggest these group populations are more likely to use nicotine products, potentially due to  
236 a lack of self-regulation and empathy for others.

237 Regression analyses provided greater insight into the relationships among personality traits,  
238 COVID-19 worry, and nicotine dependence. Among the five personality traits, agreeableness was  
239 significantly negatively correlated with nicotine dependence ( $B = -.170, p < .05$ ), indicating that higher  
240 agreeableness was associated with lower nicotine dependence. This is consistent with the negative  
241 correlation between agreeableness and nicotine dependence observed before and during COVID-19 ( $r =$   
242  $-.25, p < .001$ ;  $r = -.19, p < .001$ ) in “Table 4”. The mechanisms underlying the negative association  
243 between agreeableness and nicotine dependence may be manifold. Easy-going people tend to be more  
244 cooperative, empathetic, and willing to compromise for the benefit of others. These characteristics may  
245 make them less likely to engage in behaviors that are considered harmful or socially undesirable, such as  
246 smoking. At the same time, agreeableness tends to be associated with higher levels of social support and  
247 better stress-coping strategies. During times of stress, such as the COVID-19 pandemic, easygoing  
248 individuals may be better at seeking and utilizing social support, thus reducing the likelihood that they  
249 will turn to nicotine as a coping mechanism. This hypothesis is supported by consistent negative  
250 correlations between agreeableness and nicotine dependence before and during the pandemic.

251           Contrary to our preconceived hypothesis, we did not find an effect on smoking behavior across  
252 personalities under the influence of COVID-19 stress from the Perceived Stress Scale. In this case, our  
253 study examined the impact of a more comprehensive set of stressors on smoking behavior and found that  
254 agreeableness was negatively associated with all seven of our redesigned stressors, suggesting that  
255 individuals with higher levels of these traits reported fewer health worries during the epidemic. In  
256 addition, neuroticism was negatively associated with health and financial concerns as well, suggesting  
257 that these personality traits may alleviate some of the stress associated with the epidemic. However, we  
258 also found that extraversion was positively associated with concerns related to access to nicotine, which  
259 indicates extroverts felt more pressure during the epidemic from social interactions and restricted access  
260 to nicotine products. These results suggest that specific personality traits lead to altered nicotine  
261 dependence and that stress plays a moderating role.

262           There are several limitations to this study. First, the cross-sectional design and the sample  
263 selection limited the ability to infer causal relationships. Second, the reliance on self-reported data may be  
264 subject to recall bias and introduce social desirability bias. In addition, the sample was limited to young  
265 adults aged 18-30 years, and some specific racial groups are heavily represented, limiting the findings'  
266 generalizability to other age groups. Nonetheless, Although the Big Five Inventory is valid over time,  
267 personality is a dynamic trait. The scale can only reflect an individual's behavioral trends to a certain  
268 extent, and it has limited explanatory power for the complexity of specific behaviors. Finally, a slight  
269 adjustment of the time frame of the scale to investigate the topic of stress during the COVID-19 pandemic  
270 may have caused our study to lose certain validity.

## 271 **Conclusion**

272           In conclusion, this study highlights the significant role that personality traits and stress play in  
273 influencing young people's dependence on nicotine. Contrary to our assumptions, however, we did not  
274 find an effect of stress on the correlation between personality and nicotine dependence within the  
275 pandemic context. Regardless of our initial hypothesis, these findings provide valuable insights for the

276 development of targeted smoking cessation interventions and contribute to a broader understanding of  
277 smoking behavior within the context of personality psychology. Addressing specific stressors and  
278 demographic factors could improve the effectiveness of public health strategies aimed at reducing  
279 nicotine dependence.

280           Future studies should consider longitudinal designs to better understand the causal relationship  
281 between personality traits, stress, and nicotine dependence. Also adopting a randomized sampling  
282 approach involving samples from different age groups and cultural backgrounds would enhance the  
283 generalizability of the findings. Meanwhile, the use of some bioindicator measures can further enhance  
284 the accuracy of the results, such as utilizing the cotinine test. In addition, exploring the relationship  
285 between personality and other substance dependencies can further the understanding of the critical nature  
286 of personal traits in addiction.

287

## 288    **References**

- 289    1.        Bartal M. Health effects of tobacco use and exposure. *Monaldi Arch Chest Dis.* 2001;56(6):545-  
290    54.
- 291    2.        Organization WH. World Health Organization; 2023 [Available from: [https://www.who.int/news-](https://www.who.int/news-room/fact-sheets/detail/tobacco)  
292    [room/fact-sheets/detail/tobacco](https://www.who.int/news-room/fact-sheets/detail/tobacco).
- 293    3.        Kelly EV, Grummitt L, Teesson M, Newton NC. Associations between personality and uptake of  
294    tobacco smoking: Do they differ across adolescence? *Drug Alcohol Rev.* 2019;38(7):818-22.
- 295    4.        Hakulinen C, Hintsanen M, Munafò MR, Virtanen M, Kivimäki M, Batty GD, et al. Personality  
296    and smoking: individual-participant meta-analysis of nine cohort studies. *Addiction.* 2015;110(11):1844-  
297    52.
- 298    5.        Munafò MR, Black S. Personality and smoking status: a longitudinal analysis. *Nicotine Tob Res.*  
299    2007;9(3):397-404.
- 300    6.        Jin W, Xian B, Zhao L, Li C. Association between personality traits and smoking cessation  
301    among Chinese adults. *BMC Psychol.* 2023;11(1):398.
- 302    7.        Todd M. Daily processes in stress and smoking: effects of negative events, nicotine dependence,  
303    and gender. *Psychol Addict Behav.* 2004;18(1):31-9.
- 304    8.        Buhelt LP, Pisinger C, Andreasen AH. Smoking and stress in the general population in Denmark.  
305    *Tob Prev Cessat.* 2021;7:27.
- 306    9.        Wang Y, Chen X, Gong J, Yan Y. Relationships Between Stress, Negative Emotions, Resilience,  
307    and Smoking: Testing a Moderated Mediation Model. *Subst Use Misuse.* 2016;51(4):427-38.
- 308    10.      Conklin CA, Perkins KA. Subjective and reinforcing effects of smoking during negative mood  
309    induction. *J Abnorm Psychol.* 2005;114(1):153-64.
- 310    11.      Rowell PP. *Current Concepts on the Effects of Nicotine on Neurotransmitter Release in the*  
311    *Central Nervous System.* New York: Plenum Press; 1987.
- 312    12.      Lee JH, Kang S, Maier SU, Lee SA, Goldfarb EV, Ahn WY. Acute Stress Enhances Memory and  
313    Preference for Smoking-Related Associations in Smokers. *Nicotine Tob Res.* 2024;26(3):333-41.
- 314    13.      Pfeifer LS, Heyers K, Ocklenburg S, Wolf OT. Stress research during the COVID-19 pandemic  
315    and beyond. *Neurosci Biobehav Rev.* 2021;131:581-96.
- 316    14.      Xiong J, Lipsitz O, Nasri F, Lui LMW, Gill H, Phan L, et al. Impact of COVID-19 pandemic on  
317    mental health in the general population: A systematic review. *J Affect Disord.* 2020;277:55-64.
- 318    15.      Yingst JM, Krebs NM, Bordner CR, Hobkirk AL, Allen SI, Foulds J. Tobacco Use Changes and  
319    Perceived Health Risks among Current Tobacco Users during the COVID-19 Pandemic. *Int J Environ*  
320    *Res Public Health.* 2021;18(4).
- 321    16.      Parks MJ, Fleischer NL, Patrick ME. Increased nicotine vaping due to the COVID-19 pandemic  
322    among US young adults: Associations with nicotine dependence, vaping frequency, and reasons for use.  
323    *Prev Med.* 2022;159:107059.
- 324

**Table 1.** Descriptive statistics for participants, demographic information, and the P (chi-square or t-test) value between nicotine users (n =269) and non-nicotine users (n = 54).

| Variable                        | Nicotine users | Non-nicotine users | P (chi-square or t-test) |
|---------------------------------|----------------|--------------------|--------------------------|
| Mean Age                        | 26.78          | 22.69              | < .001**                 |
| <b>Sex at birth</b>             |                |                    | < .001**                 |
| Male                            | 170 (57.4%)    | 18 (33.3%)         |                          |
| Female                          | 98 (33.1%)     | 36 (66.9%)         |                          |
| Intersex                        | 1 (0.3%)       | 0 (0.0%)           |                          |
| <b>Race/ethnicity</b>           |                |                    | < .001**                 |
| Asian or Pacific Islander       | 47 (17.5%)     | 40 (74.1%)         |                          |
| Black or African American       | 6 (2.2%)       | 1 (1.9%)           |                          |
| Hispanic or Latino              | 8 (3.0%)       | 6 (11.1%)          |                          |
| Native American/Alaskan Native  | 9 (3.3%)       | 0 (0.0%)           |                          |
| White or Caucasian              | 192 (71.4%)    | 6 (11.1%)          |                          |
| Middle Eastern                  | 5 (1.9%)       | 0 (0.0%)           |                          |
| Another (not listed)            | 2 (0.7%)       | 1 (1.9%)           |                          |
| <b>Sexual identity</b>          |                |                    | < .05*                   |
| Heterosexual/Straight           | 171 (63.6%)    | 44 (81.5%)         |                          |
| Homosexual                      | 13 (4.8%)      | 3 (5.6%)           |                          |
| Bisexual                        | 82 (30.5%)     | 6 (11.1%)          |                          |
| Pansexual                       | 1 (0.4%)       | 0 (0.0%)           |                          |
| Asexual                         | 1 (0.4%)       | 0 (0.0%)           |                          |
| Another (not listed)            | 0 (0.0%)       | 0 (0.0%)           |                          |
| Prefer not to say               | 1 (0.4%)       | 1 (1.9%)           |                          |
| <b>Diagnosed health disease</b> |                |                    | < .001**                 |
| Chronic Mental Illness          | 56 (20.8%)     | 5 (9.3%)           |                          |
| Development Disability          | 49 (18.2%)     | 0 (0.0%)           |                          |
| Physical Disability             | 77 (28.6%)     | 1 (1.9%)           |                          |
| Neurological Disability         | 35 (13.0%)     | 0 (0.0%)           |                          |
| Learning Disability             | 35 (13.0%)     | 1 (1.9%)           |                          |
| Communication Disability        | 29 (10.8%)     | 0 (0.0%)           |                          |
| Autism Disorder                 | 24 (7.4%)      | 0 (0.0%)           |                          |
| N/A                             | 90 (33.5%)     | 45 (83.3%)         |                          |
| Another (not listed)            | 6 (2.2%)       | 2 (3.7%)           |                          |
| Prefer not to say               | 9 (3.3%)       | 1 (1.9%)           |                          |
| <b>Financial Situation</b>      |                |                    | < .05*                   |
| Live comfortably                | 147 (54.6%)    | 23 (42.6%)         |                          |
| Meet needs with a little left   | 70 (26.0%)     | 18 (33.3%)         |                          |
| Just meet basic expenses        | 51 (19.0%)     | 11 (20.4%)         |                          |
| Don't meet basic expenses       | 1 (0.4%)       | 2 (3.7%)           |                          |

p < .05\*, p < .001\*\*

medRxiv preprint doi: <https://doi.org/10.1101/2024.12.11.24318860>; this version posted December 12, 2024. The copyright holder for this preprint (which was not certified by peer review) is the author/funder, who has granted medRxiv a license to display the preprint in perpetuity. It is made available under a [CC-BY 4.0 International license](https://creativecommons.org/licenses/by/4.0/).

**Table 2.** Relationship between personality traits, and stress levels amongst nicotine users vs. nonusers during COVID-19.

| Variable               | Nicotine users    | Non-nicotine users | P (chi-square or t-test) |
|------------------------|-------------------|--------------------|--------------------------|
| <b>Personality</b>     |                   |                    |                          |
| Extraversion           | 25.73             | 23.96              | < .05*                   |
| Agreeableness          | 29.23             | 32.85              | < .001**                 |
| Conscientiousness      | 29.03             | 31.25              | < .001**                 |
| Neuroticism            | 24.82             | 25.33              | .417                     |
| Openness               | 35.10             | 34.83              | .700                     |
| HONC (before COVID-19) | 4.85 (sd = 3.96)  | N/A                | N/A                      |
| HONC (during COVID-19) | 4.71 (sd = 4.00)  | N/A                | N/A                      |
| PSS (before COVID-19)  | 26.62 (sd = 3.63) | N/A                | N/A                      |
| PSS (during COVID-19)  | 26.77 (sd = 3.50) | N/A                | N/A                      |

medRxiv preprint doi: <https://doi.org/10.1101/2024.12.14.24318860>; this version posted December 14, 2024. The copyright holder for this preprint (which was not certified by peer review) is the author/funder, who has granted medRxiv a license to display the preprint in perpetuity. It is made available under a [CC-BY 4.0 International license](https://creativecommons.org/licenses/by/4.0/).

Nicotine users (n = 269) and non-nicotine users (n = 54). The *p*-values indicate the significance level based on chi-square tests or t-tests comparing the groups of nicotine users and non-nicotine users.

**Table 3.** The correlation coefficients (r) and significance levels (p) between Big Five Personalities and HONC scores under three conditions: for all nicotine users (n = 269), high-stress, and low-stress groups. The stress groups are determined based on PSS scores compared to the average PSS scores before and during COVID-19.

| Personalities          | All Nicotine Users (r, p) | High-Stress Group (r, p) | Low-Stress Group (r, p) |
|------------------------|---------------------------|--------------------------|-------------------------|
| <b>Before COVID-19</b> |                           |                          |                         |
| Extraversion           | .096, .117                | .228, < .05*             | .050, .585              |
| Agreeableness          | -.245, < .001**           | -.248, < .05*            | -.191, < .05*           |
| Conscientiousness      | -.123, < .001**           | -.031, .722              | -.136, .131             |
| Neuroticism            | -.002, .974               | -.123, .152              | .017, .852              |
| Openness               | .005, .939                | .124, .149               | -.141, .119             |
| <b>During COVID-19</b> |                           |                          |                         |
| Extraversion           | .032, .605                | .150, .073               | .030, .757              |
| Agreeableness          | -.190, < .001**           | -.039, .645              | -.161, .097             |
| Conscientiousness      | -.114, .061               | -.102, .223              | .014, .882              |
| Neuroticism            | .034, .573                | -.031, .709              | .027, .784              |
| Openness               | -.010, .873               | .052, .532               | -.005, .958             |

Independent variables: Big Five Personality traits. Dependent variable: HONC scores.

Sample sizes: High-stress (n = 137) and low-stress (n = 124) groups before COVID-19. High-stress (n = 107) and low-stress (n = 144) groups during COVID-19.

*p* < .05\*, *p* < .001\*\*

**Table 4.** Results of linear regression models.

| Model          | Predictor/Dependent Variable                       | B      | S.E.  | Beta  | t      | Sig.     |
|----------------|----------------------------------------------------|--------|-------|-------|--------|----------|
| 1 <sup>a</sup> | <b>HONC During Covid</b>                           |        |       |       |        |          |
|                | Constant                                           | 10.689 | 3.401 | N/A   | 3.196  | < .05*   |
|                | Extraversion                                       | .083   | .071  | .082  | 1.166  | .244     |
|                | Agreeableness                                      | -.170  | .064  | -.186 | -2.670 | < .05*   |
|                | Conscientiousness                                  | -.062  | .066  | -.068 | -.945  | .345     |
|                | Openness                                           | .010   | .053  | .013  | .189   | .851     |
|                | Neuroticism                                        | -.021  | .062  | -.023 | -.343  | .732     |
| 2 <sup>b</sup> | <b>During COVID-19 Health Concerns</b>             |        |       |       |        |          |
|                | Constant                                           | 1.686  | .319  | N/A   | 5.287  | < .001** |
|                | Extraversion                                       | .008   | .007  | .084  | 1.224  | .222     |
|                | Agreeableness                                      | -.020  | .006  | -.218 | -3.213 | < .05*   |
|                | Conscientiousness                                  | -.008  | .006  | -.094 | -1.357 | .176     |
|                | Neuroticism                                        | -.019  | .006  | -.218 | -3.269 | < .05*   |
|                | Openness                                           | .008   | .005  | .104  | 1.548  | .123     |
|                | <b>During COVID-19 access to Nicotine Concerns</b> |        |       |       |        |          |
|                | Constant                                           | .959   | .300  | N/A   | 3.192  | < .05*   |
|                | Extraversion                                       | .019   | .006  | .204  | 3.053  | < .05*   |
|                | Agreeableness                                      | -.030  | .006  | -.347 | -5.263 | < .001** |
|                | Conscientiousness                                  | -.005  | .006  | -.054 | -.798  | .425     |
|                | Neuroticism                                        | -.003  | .005  | -.034 | -.532  | .595     |
|                | Openness                                           | .007   | .005  | .107  | 1.636  | .103     |
|                | <b>During COVID-19 economic Factors Concerns</b>   |        |       |       |        |          |
|                | Constant                                           | 1.563  | .348  | N/A   | 4.489  | < .001** |
|                | Extraversion                                       | .012   | .007  | .110  | 1.618  | .107     |
|                | Agreeableness                                      | -.034  | .007  | -.335 | -5.019 | < .001** |
|                | Conscientiousness                                  | -.009  | .007  | -.091 | 1.330  | .185     |
|                | Neuroticism                                        | -.016  | .006  | -.170 | -2.596 | <.05*    |
|                | Openness                                           | .003   | .005  | .039  | .583   | .560     |
|                | <b>During Covid Mental Health Stress Concerns</b>  |        |       |       |        |          |
|                | Constant                                           | 1.632  | .315  | N/A   | 5.182  | < .001** |
|                | Extraversion                                       | .007   | .007  | .075  | 1.076  | .283     |
|                | Agreeableness                                      | -.018  | .006  | -.209 | -3.024 | < .05*   |
|                | Conscientiousness                                  | -.007  | .006  | -.087 | -1.224 | .222     |
|                | Neuroticism                                        | -.008  | .006  | -.093 | -1.371 | .172     |
|                | Openness                                           | .000   | .005  | .006  | .091   | .928     |
|                | <b>During COVID-19 Routine Disruption Concerns</b> |        |       |       |        |          |
|                | Constant                                           | 1.366  | .342  | N/A   | 3.997  | < .001** |
|                | Extraversion                                       | .013   | .007  | .129  | 1.855  | .065     |
|                | Agreeableness                                      | -.023  | .007  | -.245 | -3.570 | < .001** |

medRxiv preprint doi: <https://doi.org/10.1101/2024.12.11.24318860>; this version posted December 12, 2024. The copyright holder for this preprint (which was not certified by peer review) is the author/funder, who has granted medRxiv a license to display the preprint in perpetuity. It is made available under a [CC-BY 4.0 International license](https://creativecommons.org/licenses/by/4.0/).



|                      |                                                 |       |       |       |        |          |
|----------------------|-------------------------------------------------|-------|-------|-------|--------|----------|
|                      | Conscientiousness                               | -.003 | .007  | -.029 | -.410  | .682     |
|                      | Neuroticism                                     | -.003 | .006  | -.030 | -.440  | .660     |
|                      | Openness                                        | .000  | .005  | .005  | -.069  | .945     |
|                      | <b>During Covid Social Network Concerns</b>     |       |       |       |        |          |
|                      | Constant                                        | 1.431 | .289  | N/A   | 4.948  | < .001** |
|                      | Extraversion                                    | .005  | .006  | .060  | .857   | .392     |
|                      | Agreeableness                                   | -.017 | .006  | -.215 | -3.087 | < .05*   |
|                      | Conscientiousness                               | -.002 | .006  | -.024 | -.331  | .741     |
|                      | Neuroticism                                     | -.006 | .005  | -.075 | -1.092 | .276     |
|                      | Openness                                        | .001  | .004  | .018  | -.260  | .795     |
|                      | <b>During COVID-19 Traumatic Event Concerns</b> |       |       |       |        |          |
|                      | Constant                                        | 1.520 | .349  | N/A   | 4.349  | < .001** |
|                      | Extraversion                                    | .014  | .007  | .128  | 1.833  | .068     |
|                      | Agreeableness                                   | -.021 | .007  | -.212 | -3.098 | < .05*   |
|                      | Conscientiousness                               | -.010 | .007  | -.104 | -1.482 | .140     |
|                      | Neuroticism                                     | -.010 | .006  | -.103 | -1.536 | .126     |
|                      | Openness                                        | .004  | .005  | .046  | .675   | .500     |
| <b>3<sup>c</sup></b> | <b>HONC During COVID-19</b>                     |       |       |       |        |          |
|                      | Constant                                        | 1.383 | .713  | N/A   | 1.941  | .053     |
|                      | Health concerns                                 | -.469 | .797  | -.046 | -.588  | .557     |
|                      | Economic Factors Concerns                       | 2.666 | .839  | .252  | 3.180  | < .05*   |
|                      | Mental Health Stress Concerns                   | 1.633 | .934  | -.180 | -1.781 | .076     |
|                      | Routine Disruption Concerns                     | 2.571 | 1.035 | .265  | 2.485  | < .05*   |
|                      | Social Network Concerns                         | -.771 | .942  | -.066 | -.818  | .414     |
|                      | Traumatic Event Concerns                        | 2.139 | .942  | .226  | 2.272  | .024     |

medRxiv preprint doi: <https://doi.org/10.1101/2024.12.11.24318860>; this version posted December 12, 2024. The copyright holder for this preprint (which was not certified by peer review) is the author/funder, who has granted medRxiv a license to display the preprint in perpetuity. It is made available under a [CC-BY 4.0 International license](https://creativecommons.org/licenses/by/4.0/).

<sup>a</sup>Model 1 is to test the regression between personalities and nicotine dependence.

<sup>b</sup>Model 2 is to test the regression between personalities and COVID concerns.

<sup>c</sup>Model 3 is to test the regression between Covid concerns and nicotine dependence.

*B*: Unstandardized regression coefficient. *S.E.*: Standard error of the coefficient. *Beta*: Standardized regression coefficient. *t*: t-value for the hypothesis test of whether the coefficient is different from zero.

*Sig.*: Significance level of the test. *N/A*: Not applicable for the constant in the regression model.

*n* = 269 for Model 1, *n* = 254 for Model 2 and Model 3  $p < .05^*$ ,  $p < .001^{**}$ .
